# Supplementary material
Source: Springer Nature journal article supplement (https://www.springermedizin.de/resource/supplementary/12902_2014_271_MOESM1_ESM.pdf/9515928)

I

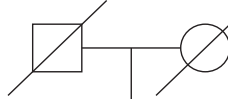

II

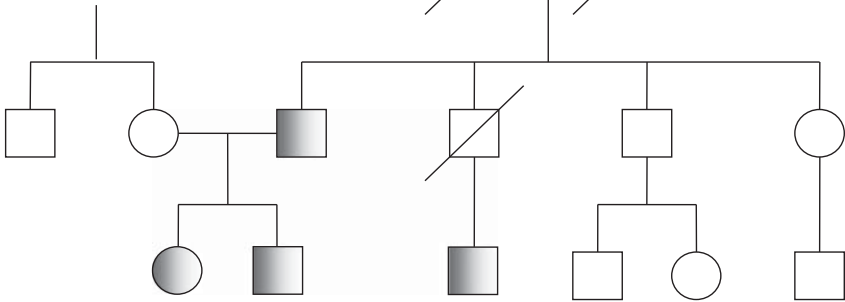

III

Supplement: MOESM1 [file 9515928]
